# Supplementary material for: Elongating RNA polymerase II and RNA:DNA hybrids hinder fork progression and gene expression at sites of head-on replication-transcription collisions
Source: PubMed Central journal article supplement — Nucleic Acids Res. 2021 Dec 8;49(22):12769–84. doi: 10.1093/nar/gkab1146 (PMC8682787; doi:10.1093/nar/gkab1146), 2021-12-08
Supplement: gkab1146_supplemental_file.pdf [file gkab1146_supplemental_file.pdf]

## **SUPPLEMENTAL INFORMATIONS**

### **Elongating RNA polymerase II and RNA:DNA hybrids hinder fork progression and gene expression at sites of head-on replication-transcription collisions.**

Luca Zardoni<sup>1,2</sup>, Eleonora Nardini<sup>1</sup>, Alessandra Brambati<sup>1</sup>, Chiara Lucca<sup>3</sup>, Ramveer Choudhary<sup>3</sup>, Federica Loperfido<sup>1</sup>, Simone Sabbioneda<sup>1</sup> and Giordano Liberi<sup>1,3</sup>

<sup>1</sup>Istituto di Genetica Molecolare “Luigi Luca Cavalli-Sforza”, CNR, 27100 Pavia, Italy

<sup>2</sup>Scuola Universitaria Superiore IUSS, 27100, Pavia, Italy

<sup>3</sup>IFOM Foundation, 20139 Milan, Italy

#### **Contents:**

**Supplementary Figures S1-S7**

**Supplementary Table S1**

**A**

***PDC1* expression**  
after 150 minutes release in 0.2 M HU

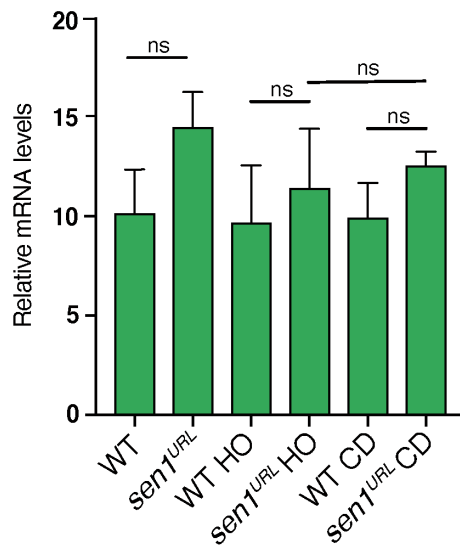**B**

**DRIP at *PDC1***

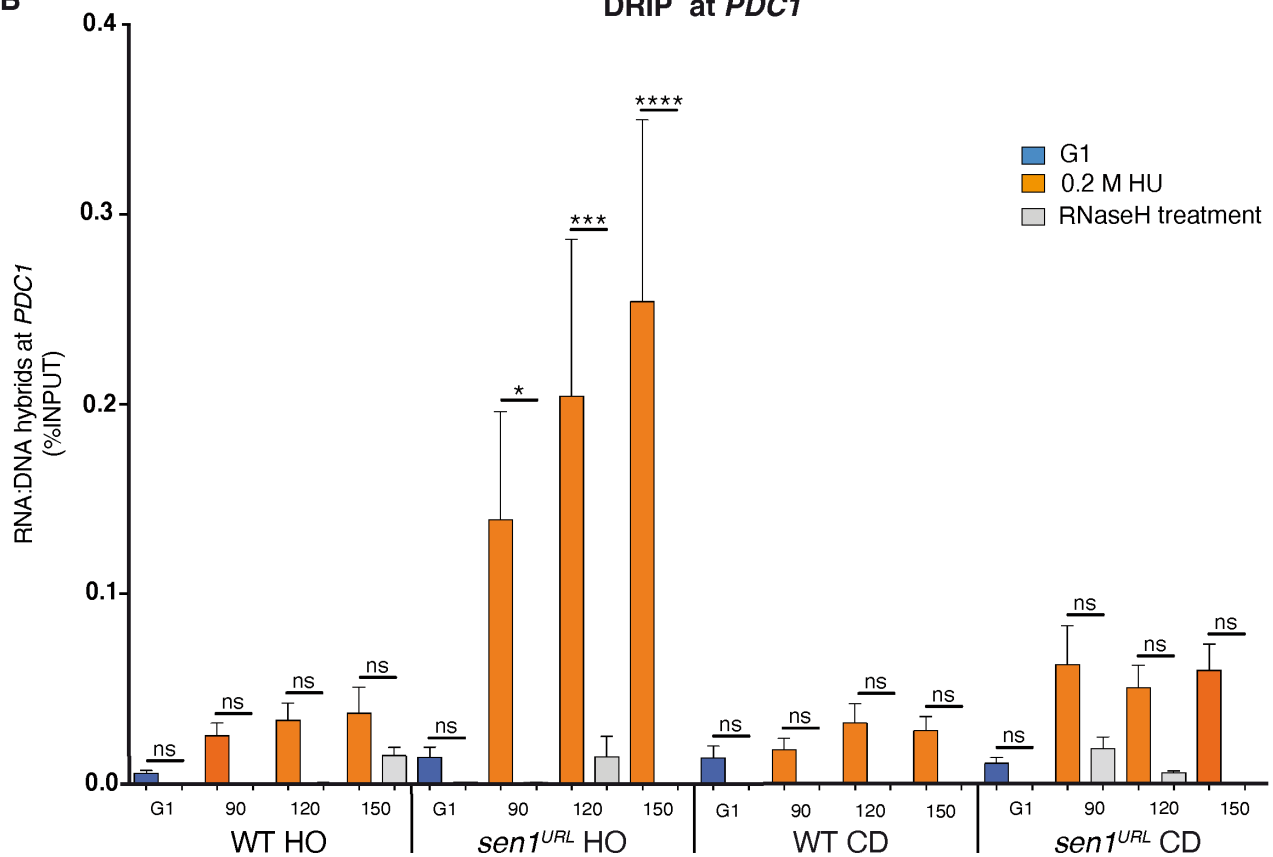

**Supplementary Figure S1.** Additional analysis of head-on and co-directional replication-transcription conflicts in WT and *sen1* strains. **(A)** *PDC1* mRNA levels measured by qPCR at the gene in head-on (HO) or co-directional (CD) orientation to *ARS607*-dependent replication. Data represent mean  $\pm$  SEM from three independent experiments. ns, not significant (two-way ANOVA). **(B)** DRIP-qPCR in Figure 1B shown with analysis on samples treated with RNase H. Data represent mean  $\pm$  SEM from three independent experiments. ns, not significant; \* $P < 0.05$ ; \*\*\* $P < 0.001$ ; \*\*\*\* $P < 0.0001$  (two-way ANOVA).

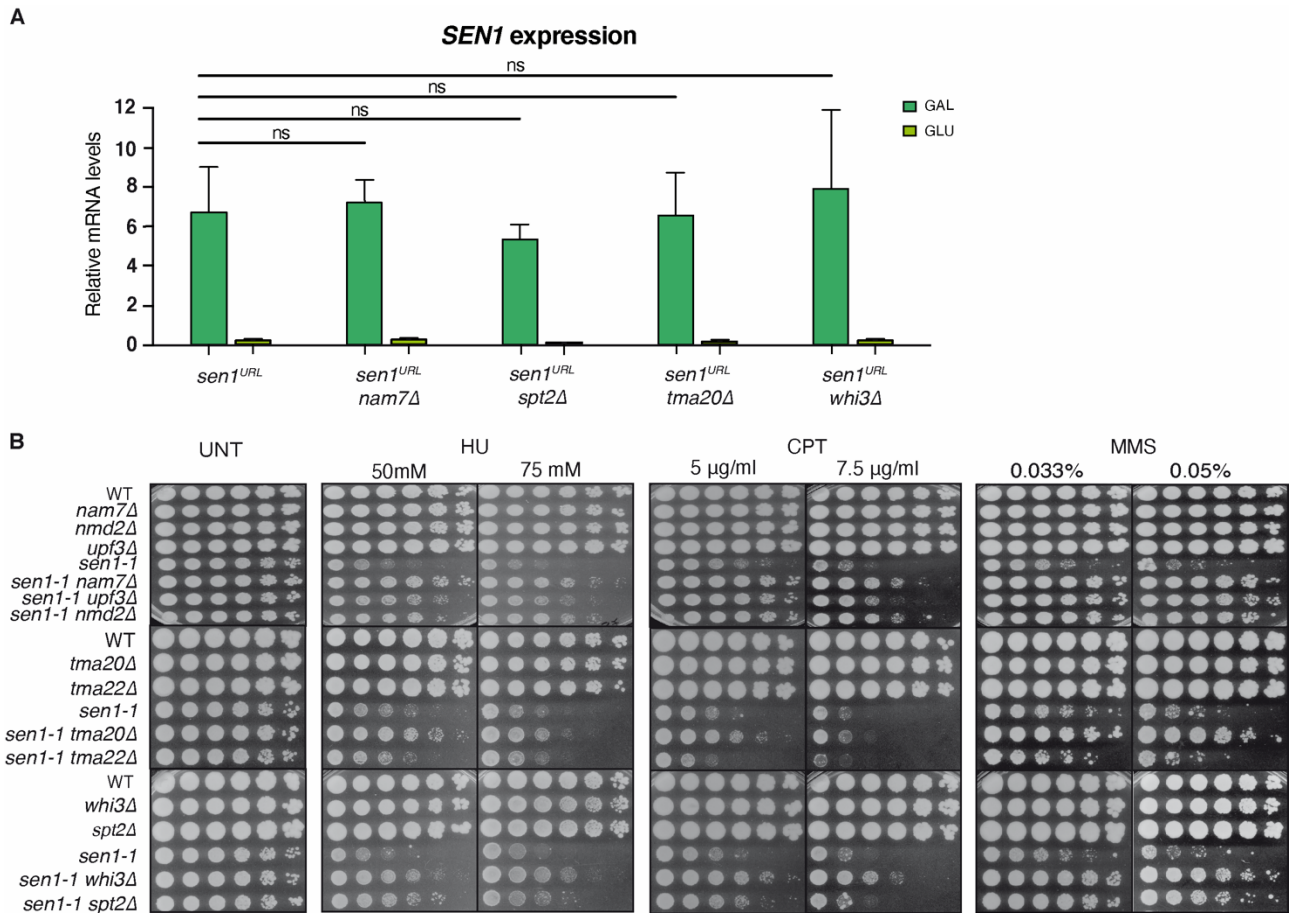

**Supplementary Figure S2.** *sen1<sup>URL</sup>* suppressors do not regulate *SEN1* levels and rescue DNA damage sensitivity of *sen1-1* allele. (A) *SEN1* mRNA levels measured by qPCR in YPG and after 4 hours-shift in YPD. Data represent mean  $\pm$  SEM from three independent experiments. ns, not significant (two-way ANOVA). (B) Serial dilutions of the indicated strains were spotted on YPD and YPD supplemented with different concentrations of Hydroxyurea (HU), Camptothecin (CPT) and Methyl methanesulfonate (MMS) and grown at the semi-permissive temperature of 30°C for *sen1-1*.

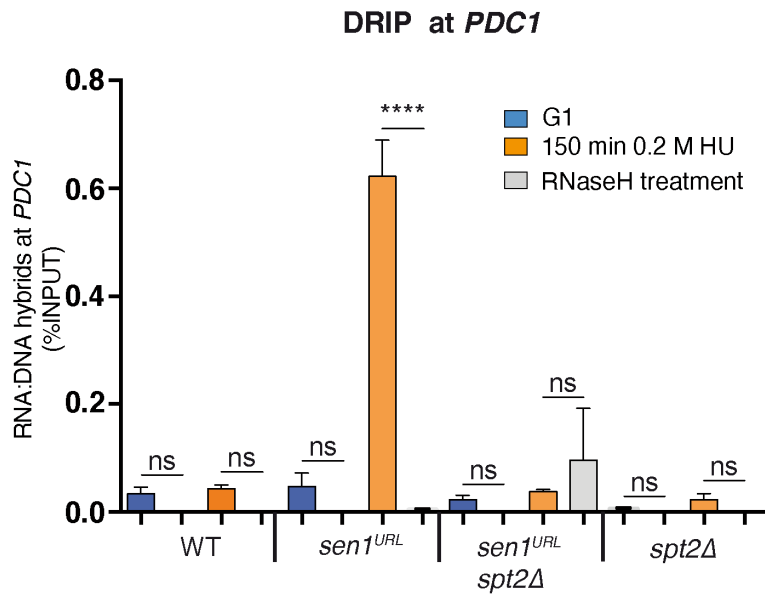

**Supplementary Figure S3.** *In vitro* RNase H treatment of RNA:DNA hybrids detected by DRIP-qPCR. DRIP-qPCR in Figure 3B shown with the analysis on samples treated with RNase H. Data represent mean  $\pm$  SEM from three independent experiments. ns, not significant; \*\*\*\* $P < 0.0001$  (two-way ANOVA).

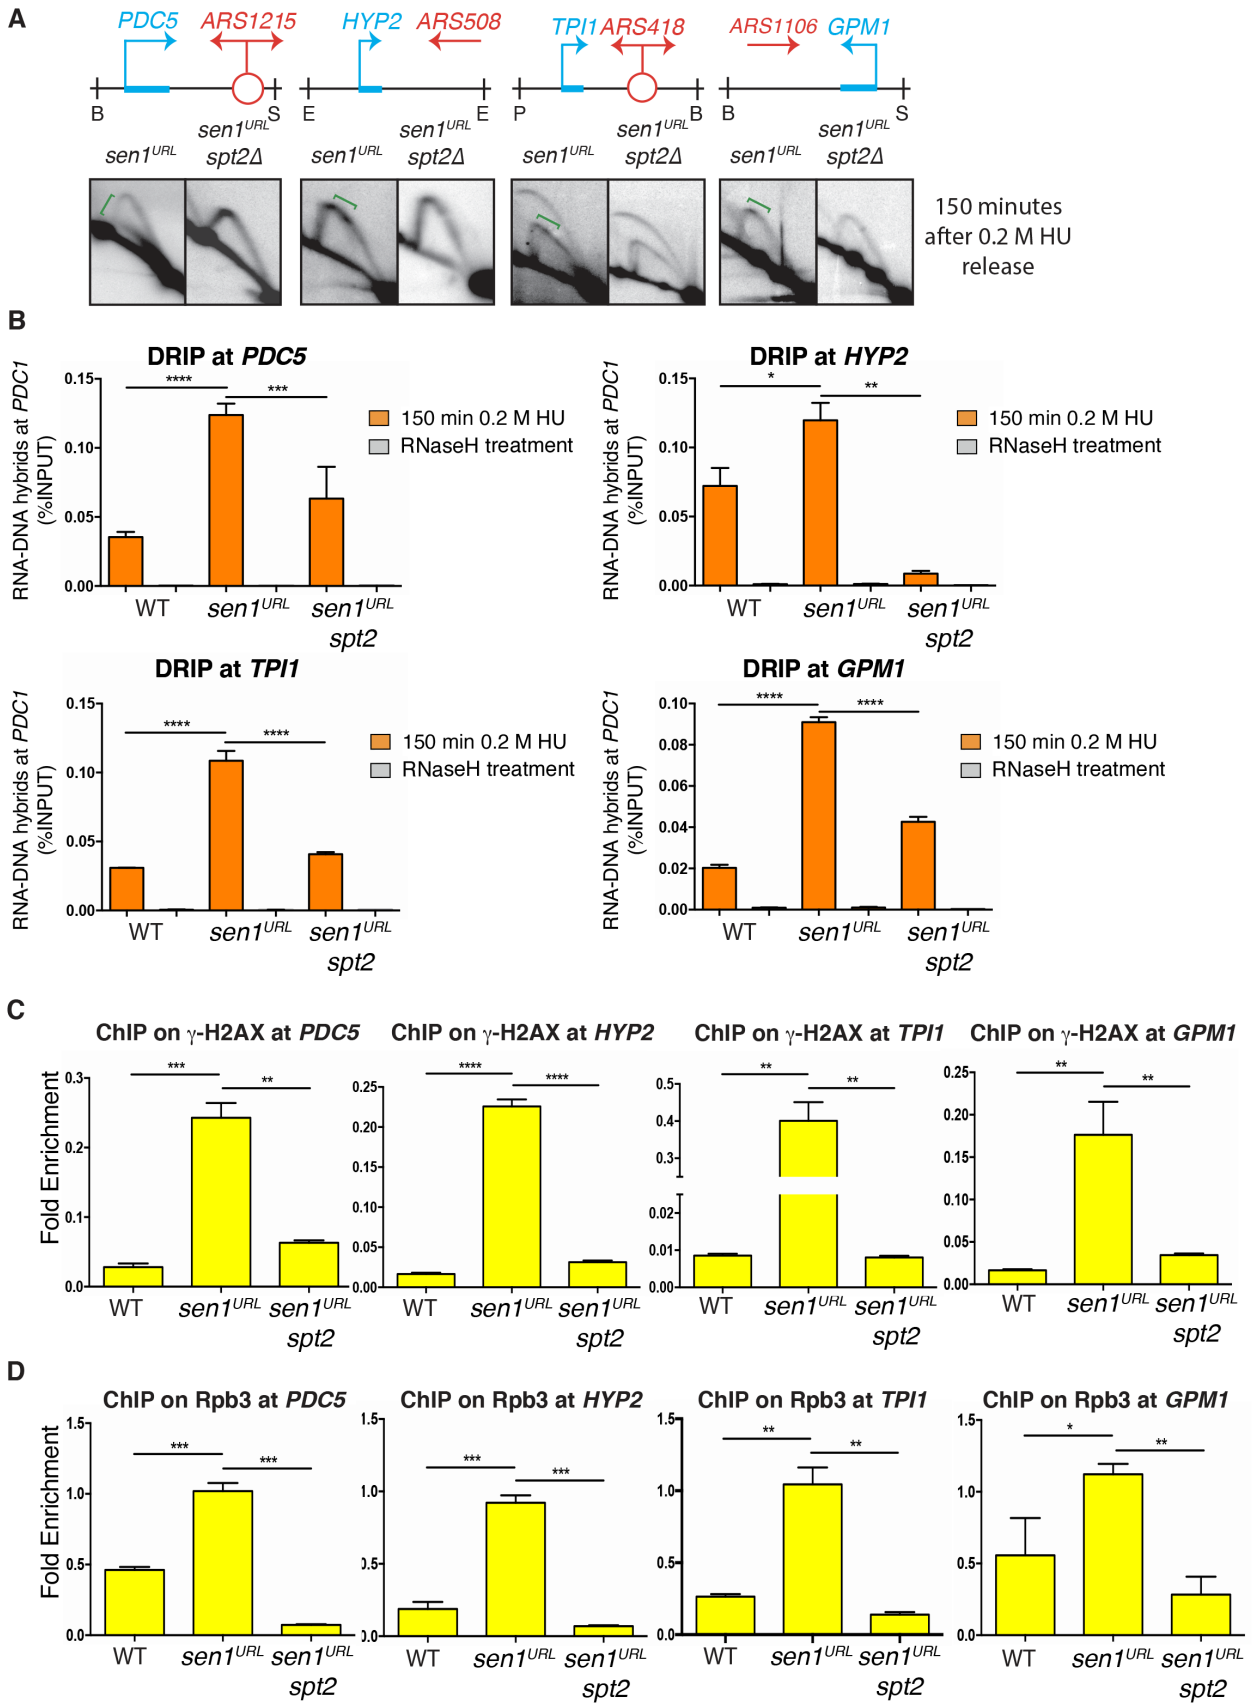

**Supplementary Figure S4.** Dangerous outcomes of head-on replication-transcription collisions at highly expressed genes in *sen1* mutants and suppression by Spt2 inactivation. **(A)** Yeast strains were treated in HU as in Figure 3A and replication intermediates were analyzed by 2D gel technique at the *PDC5*, *HYP2*, *TPI1* and *GPM1* loci upon digestion with BglII/SphI (B/S), EcoRI (E), PstI/BamHI (P/B) and BamHI/StuI (B/S), respectively. Green brackets indicate *sen1*-dependent replication fork defects at sites of collisions with transcription. At the same transcribed loci, the levels of RNA:DNA hybrids **(B)** were analyzed by DRIP-qPCR and the levels of  $\gamma$ -H2AX **(C)** or Rpb3 **(D)** by ChIP-qPCR. Data represent mean  $\pm$  SEM from three independent experiments. \* $P < 0.05$ ; \*\* $P < 0.01$ ; \*\*\* $P < 0.001$ ; \*\*\*\* $P < 0.0001$  (two-way ANOVA). Analysis at *PDC5* gene were conducted in strains not expressing *PDC1*.

**A**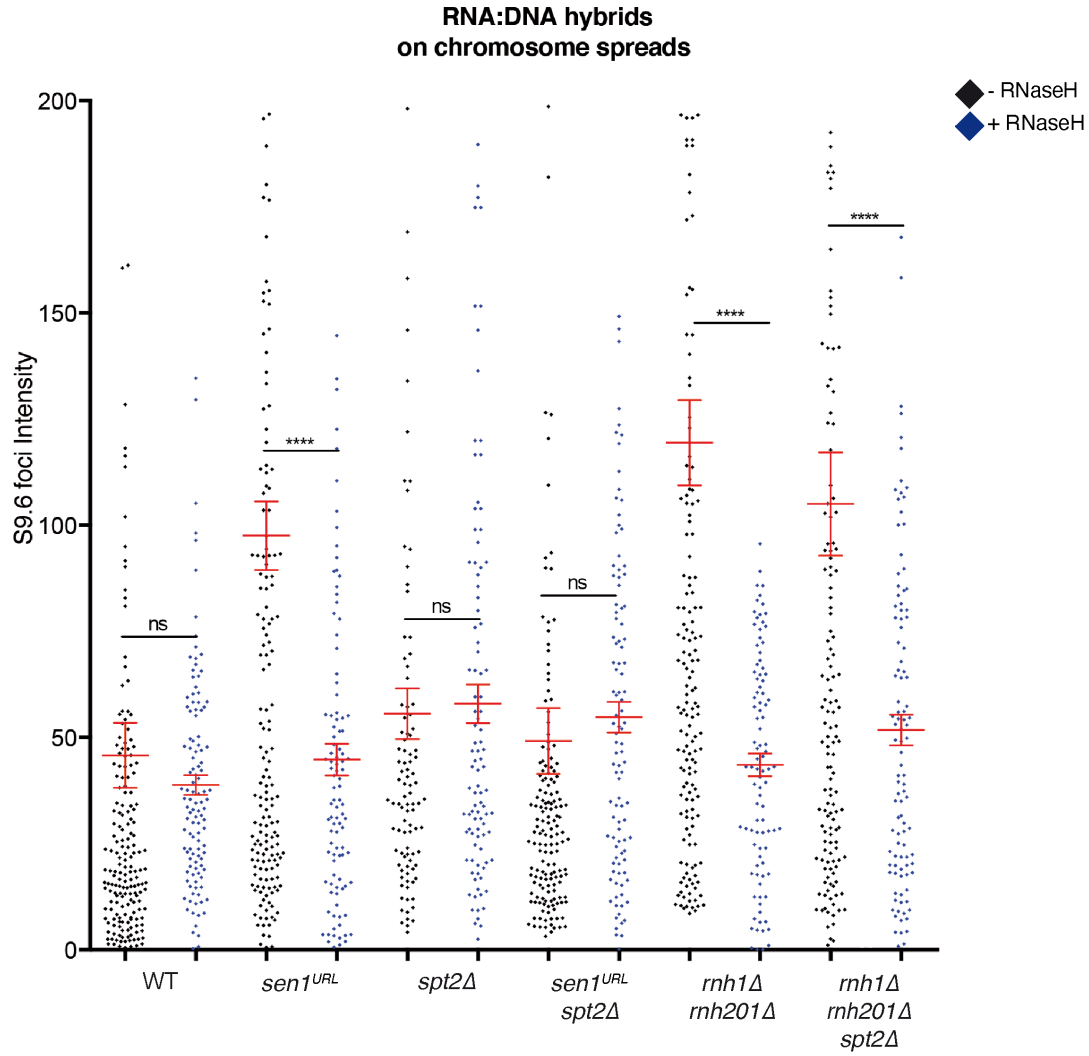**B**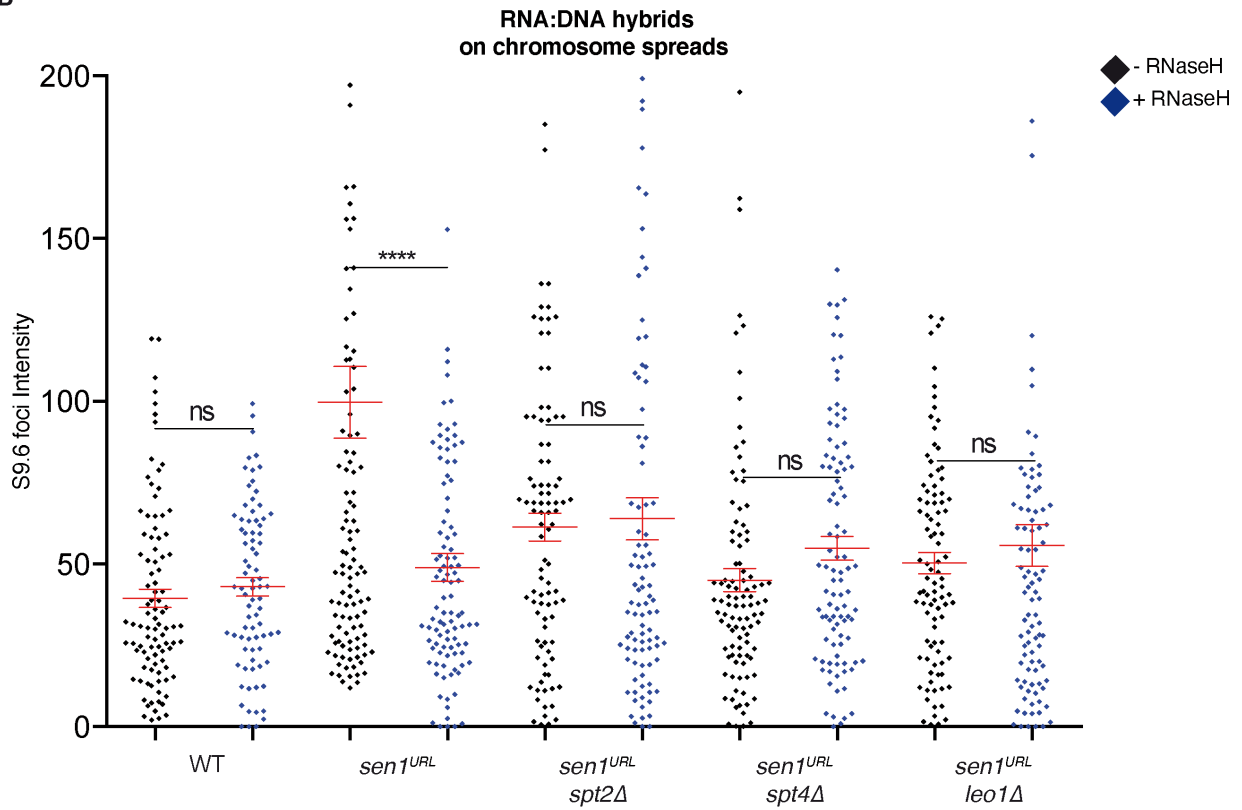

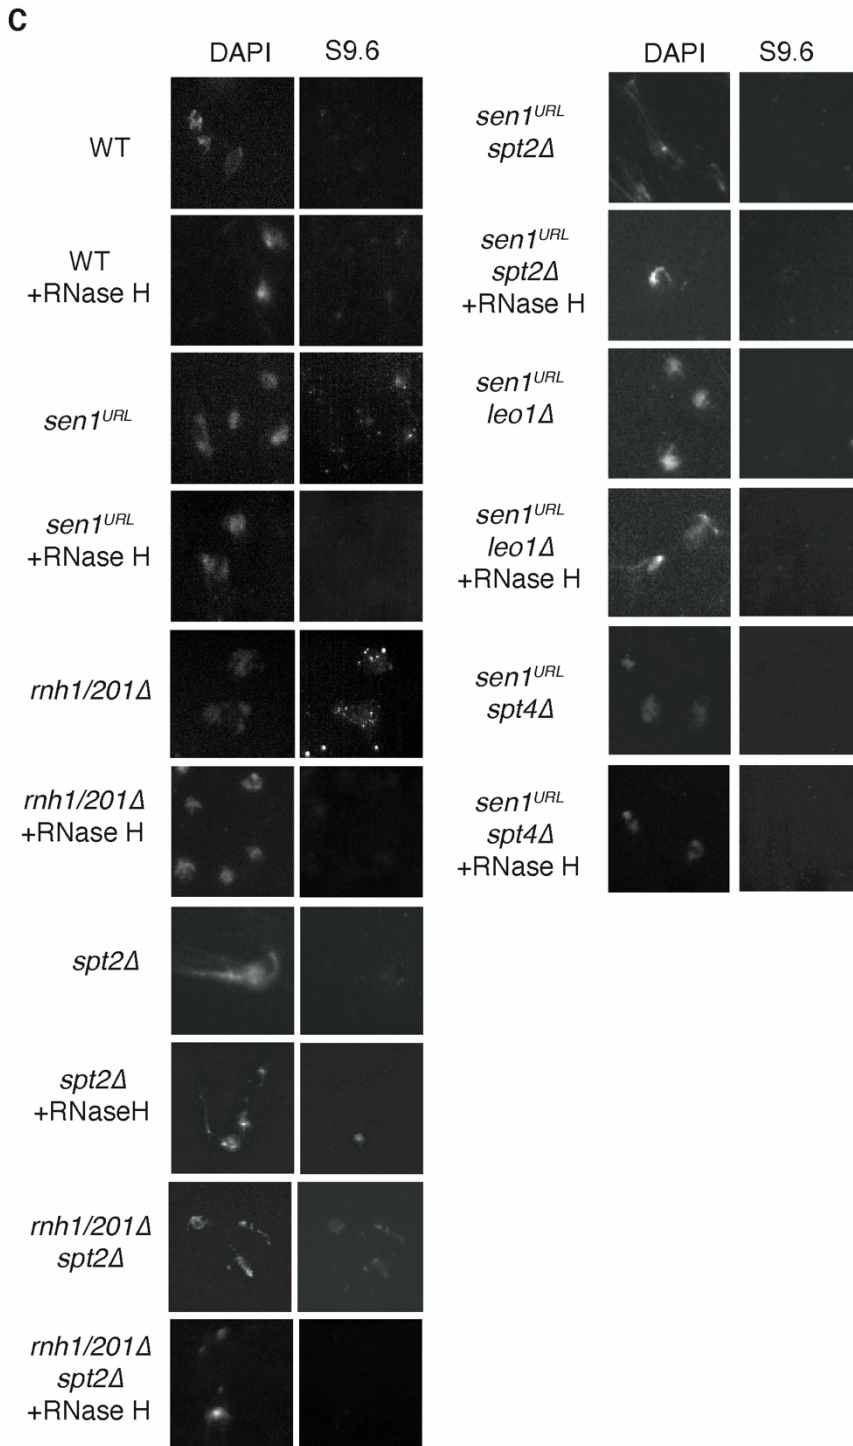

**Supplementary Figure S5.** In *vitro* RNase H treatment of S9.6 foci detected by IF. S9.6 foci quantification on chromosome spreads in Figure 4A (A) or in Figure 5C (B) shown with the analysis on samples treated with RNase H enzyme. Data represent mean  $\pm$  SEM from three independent experiments. At least 100 nuclei for each experiment were analyzed. ns, not significant; \*\*\*\*P<0.0001 (unpaired two-tails t-test). (C) Representative images of S9.6 immunostaining on chromosome spreads treated or not with RNase H.



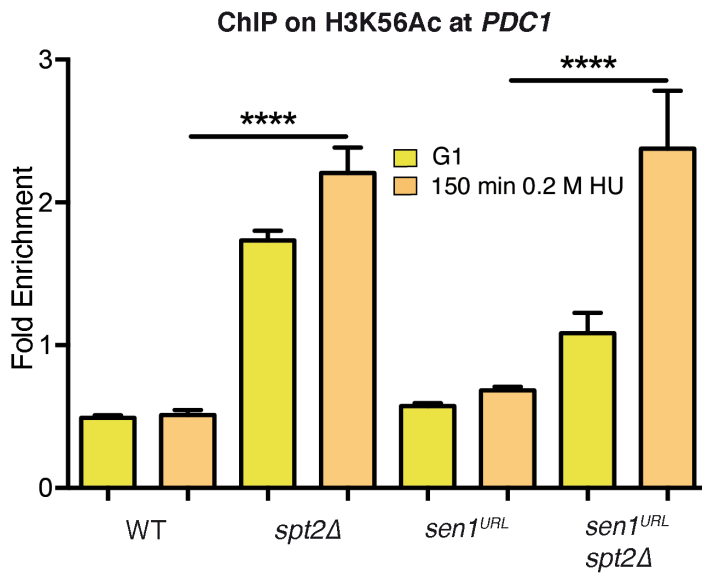

**Supplementary Figure S6.** Analysis of H3K56ac levels. ChIP-qPCR analysis at *PDC1* locus of histone H3 lysine 56-acetylated (H3K56ac). Data represent mean  $\pm$  SEM from three independent experiments. \*\*\*\*P<0.0001 (two-way ANOVA).

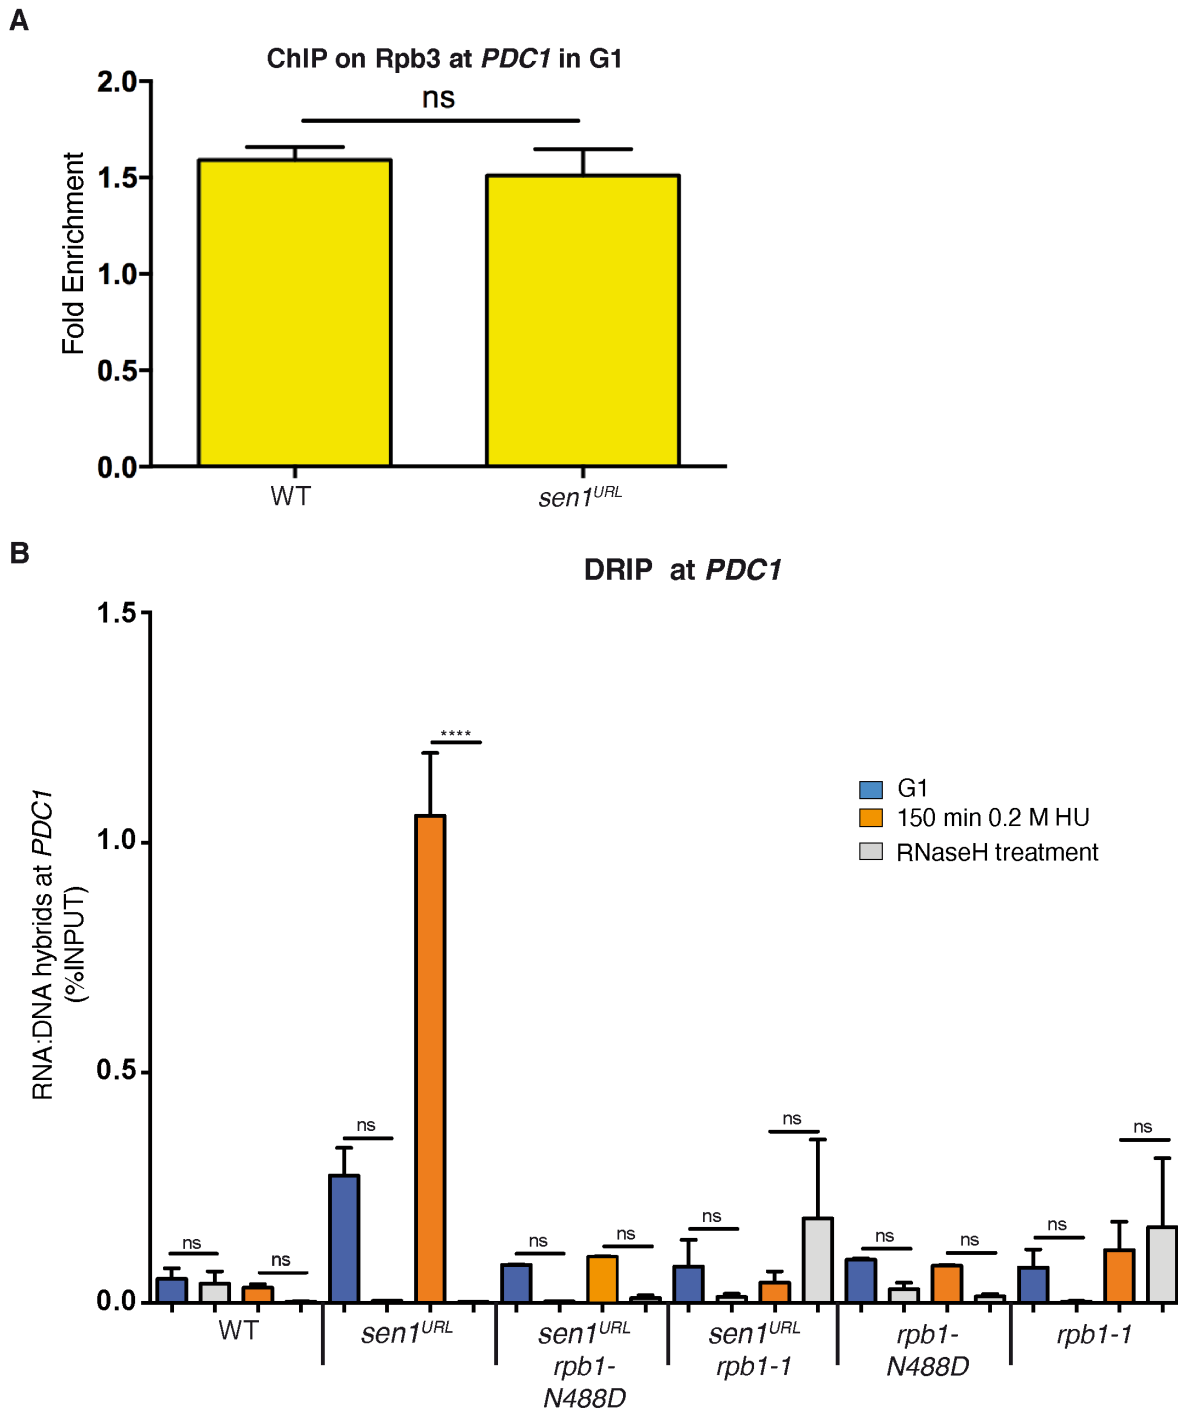

**Supplementary Figure S7.** Additional analysis of RNAPII accumulation at *PDC1* gene in *sen1* mutants. (A) ChIP-qPCR analysis at *PDC1* locus of the Rpb3 subunit of the RNAPII complex in cells arrested in G1-phase of the cell cycle. Data represent mean  $\pm$  SEM from three independent experiments. ns, not significant (two-way ANOVA). (B) *In vitro* RNase H treatment of RNA:DNA hybrids detected by DRIP-qPCR. DRIP-qPCR in Figure 6F shown with analysis on samples treated with RNase H. Data represent mean  $\pm$  SEM from three independent experiments. ns, not significant; \*\*\*\* $P < 0.0001$  (two-way ANOVA).

**Supplementary Table S1**

| <b>number</b> | <b>Genotype</b>                                                                                     | <b>Reference</b>     |
|---------------|-----------------------------------------------------------------------------------------------------|----------------------|
| GF 9          | <i>MATa ade2-1 trp1-1 leu2-3 112 his3-11 15 ura3-1 can1-100 GALPSI<sup>+</sup> RAD5<sup>+</sup></i> | R.Rothstein, H.Klein |
| GH 788        | <i>MATa, KANMX6-GAL-URL-3HA-SEN1</i>                                                                | Lab stock            |
| GH 176        | <i>MATa, sen1-1-NAT</i>                                                                             | Lab stock            |
| GH 1059       | <i>MATa, PDC1 CD at 948bp from ARS607, pdc1::URA3</i>                                               | This study           |
| GH 1067       | <i>MATa, KANMX6-GAL-URL-3HA-SEN1, PDC1 CD at 948bp from ARS607, pdc1::URA3</i>                      | This study           |
| GH 1083       | <i>MATa, PDC1 HO at 948bp from ARS607, pdc1::URA3</i>                                               | This study           |
| GH 1082       | <i>MATa, KANMX6-GAL-URL-3HA-SEN1, PDC1 HO at 948bp from ARS607, pdc1::URA3</i>                      | This study           |
| GH1349        | <i>MATa, PDC1 CD at 948bp from ARS607, pdc1::HIS3MX6</i>                                            | This study           |
| GH1351        | <i>MATa, sen1-1-NAT, PDC1 CD at 948bp from ARS607, pdc1::HIS3MX6</i>                                | This study           |
| GH1350        | <i>MATa, PDC1 HD at 948bp from ARS607, pdc1::HIS3MX6</i>                                            | This study           |
| GH1345        | <i>MATa, sen1-1-NAT, PDC1 HD at 948bp from ARS607, pdc1::HIS3MX6</i>                                | This study           |
| GH 500        | <i>MATa, KANMX6-GAL-URL-3HA-SEN1, nam7::HIS3MX6</i>                                                 | This study           |
| GH 707        | <i>MATa, NAT-GAL-URL-3HA-SEN1, nmd2::HIS3MX6</i>                                                    | This study           |
| GH 703        | <i>MATa, NAT-GAL-URL-3HA-SEN1, upf3::HIS3MX6</i>                                                    | This study           |
| GH 622        | <i>MATa, NAT-GAL-URL-3HA-SEN1, tma20::HIS3MX6</i>                                                   | This study           |
| GH 624        | <i>MATa, NAT-GAL-URL-3HA-SEN1, tma22::HIS3MX6</i>                                                   | This study           |
| GH 410        | <i>MATa, KANMX6-GAL-URL-3HA-SEN1, whi3::HIS3MX6</i>                                                 | This study           |
| GH 595        | <i>MATa, KANMX6-GAL-URL-3HA-SEN1, spt2::HIS3MX6</i>                                                 | This study           |
| GH 354        | <i>MATa, nam7::HIS3MX6</i>                                                                          | This study           |
| GH 678        | <i>MATa, nmd2::HIS3MX6</i>                                                                          | This study           |
| GH 676        | <i>MATa, upf3::HIS3MX6</i>                                                                          | This study           |
| GH 633        | <i>MATa, tma20::HIS3MX6</i>                                                                         | This study           |
| GH 635        | <i>MATa, tma22::HIS3MX6</i>                                                                         | This study           |
| GH 459        | <i>MATa, whi3::HIS3MX6</i>                                                                          | This study           |
| GH 593        | <i>MATa, spt2::HIS3MX6</i>                                                                          | This study           |
| GH 502        | <i>MATa, sen1-1-NAT, nam7::HIS3MX6</i>                                                              | This study           |
| GH 727        | <i>MATa, sen1-1-NAT, upf3::HIS3MX6</i>                                                              | This study           |
| GH736         | <i>MATa, sen1-1-NAT, nmd2::HIS3MX6</i>                                                              | This study           |
| GH 622        | <i>MATa, sen1-1-NAT, tma20::HIS3MX6</i>                                                             | This study           |
| GH 630        | <i>MATa, sen1-1-NAT, tma22::HIS3MX6</i>                                                             | This study           |
| GH748         | <i>MATa, sen1-1-NAT, whi3::HIS3MX6</i>                                                              | This study           |
| GH616         | <i>MATa, sen1-1-NAT, spt2::HIS3MX6</i>                                                              | This study           |
| GH 616        | <i>MATa, sen1-1-NAT, spt2:: HIS3MX6</i>                                                             | This study           |
| GH 37         | <i>MATa, rnh1::HIS3MX6, rnh201::NAT</i>                                                             | Lab stock            |
| GH 1305       | <i>MATa, rnh1::HIS3MX6, rnh201::NAT, spt2::URA3</i>                                                 | This study           |
| GH 855        | <i>MATalpha, mrc1::URA3</i>                                                                         | Lab stock            |
| GH 1167       | <i>MATa, KANMX6-GAL-URL-3HA-SEN1, spt4::HIS3MX6</i>                                                 | This study           |

|         |                                                                                             |            |
|---------|---------------------------------------------------------------------------------------------|------------|
| GH 620  | <i>MATa, NAT-GAL-URL-3HA-SEN1, leo1::HIS3MX6</i>                                            | Lab stock  |
| GH 1256 | <i>MATa, NAT-GAL-URL-3HA-SEN1, nhp6A::KANMX6, nhp6B::URA3</i>                               | This study |
| GH 1106 | <i>MATa, NAT-GAL-URL-3HA-SEN1, hmo1::KANMX6</i>                                             | This study |
| GH 1146 | <i>MATa, KANMX6-GAL-URL-3HA-SEN1, hho1::URA3</i>                                            | This study |
| GH 1176 | <i>Mata, KANMX6-GAL-URL-3HA-SEN1, hht1::URA3,</i>                                           | This study |
| GH 1269 | <i>MATa, NAT-GAL-URL-3HA-SEN1, bre1::KANMX6</i>                                             | This study |
| GH 1114 | <i>MATa, NAT-GAL-URL-3HA-SEN1, set1::URA3</i>                                               | This study |
| GH 374  | <i>MATa, KANMX6-GAL-URL-3HA-SEN1, jhd2::HIS3MX6</i>                                         | Lab stock  |
| GH 444  | <i>MATa, KANMX6-GAL-URL-3HA-SEN1, rtt109::TRP1</i>                                          | Lab stock  |
| GH 1252 | <i>MATa, NAT-GAL-URL-3HA-SEN1, hst4::HIS3MX6, hst3::URA3</i>                                | This study |
| GH587   | <i>MATa, Δ promoter PDC1 (deletion from coordinates 234402 to 235141 on chromosome XII)</i> | Lab Stock  |
| GH 612  | <i>MATa, Δ promoter PDC1, KANMX6-GAL-URL-3HA-SEN1</i>                                       | This study |
| GH 1346 | <i>MATa, Δ promoter PDC1, KANMX6-GAL-URL-3HA-SEN1, spt2::HIS3MX6</i>                        | This study |
| GF 113  | <i>MATa, rpb1-1</i>                                                                         | Lab Stock  |
| GF 145  | <i>MATa, rpb1-N488D</i>                                                                     | This study |
| GH 1351 | <i>MATa, KANMX6-GAL-URL-3HA-SEN1, rpb1-1</i>                                                | This study |
| GH 1357 | <i>MATa, KANMX6-GAL-URL-3HA-SEN1, rpb1-N488D</i>                                            | This study |
